# Supplementary material for: Electric Fields Elicit Ballooning in Spiders
Source: PubMed Central journal article supplement (PMC6065530; doi:10.1016/j.cub.2018.05.057), 2018-07-23
Supplement: mmc1.pdf [file mmc1.pdf]

**Current Biology, Volume 28**

**Supplemental Information**

**Electric Fields Elicit Ballooning in Spiders**

**Erica L. Morley and Daniel Robert**

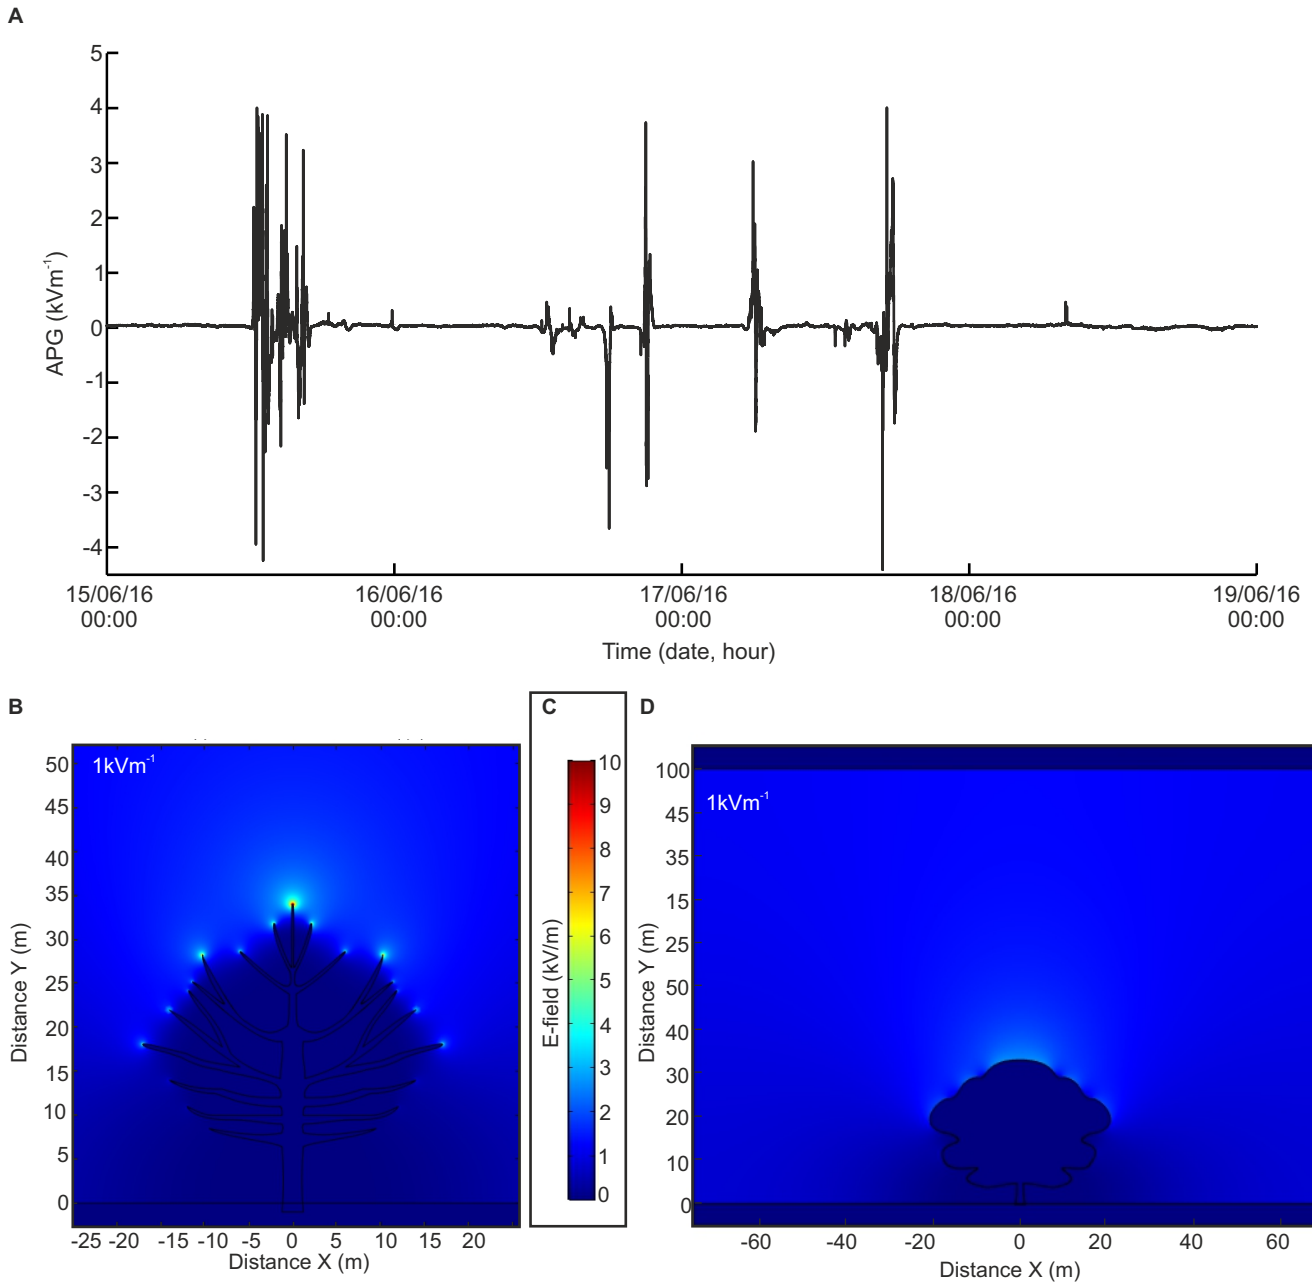

**Figure S1. Further electric field quantifications, related to Figure 1**

A) Atmospheric potential gradient (APG) measured across 4 days using a field mill (Chillworth JCI131) at the University of Bristol School of Veterinary Sciences, Langford. B) FEA model detailing the e-field around geometrically sharp tree branches in an APG strength of  $1\text{kV/m}^{-1}$ . C) Scale bar for (B) and (D). D) FEA model of e-field enhancement around a geometrically domed oak tree in an APG strength of  $1\text{kV/m}^{-1}$ . The scale in figure S1 B-D are the same as the scale in figure 1B-D, for comparison.

| Distribution   | Fixed factor                                  | Level                | Coefficient estimate | Standard error | Z value | p value    |
|----------------|-----------------------------------------------|----------------------|----------------------|----------------|---------|------------|
| Tiptoes        |                                               |                      |                      |                |         |            |
| Poisson        | Field strength (reference 0Vm <sup>-1</sup> ) | 1.25Vm <sup>-1</sup> | 1.25                 | 0.8            | 1.565   | 0.118      |
|                |                                               | 6.25Vm <sup>-1</sup> | 2.91                 | 0.72           | 4.025   | <0.0001*** |
| Dragline drops |                                               |                      |                      |                |         |            |
| Poisson        | Field strength (reference 0Vm <sup>-1</sup> ) | 1.25Vm <sup>-1</sup> | 1.04                 | 0.35           | 2.952   | 0.003**    |
|                |                                               | 6.25Vm <sup>-1</sup> | 1.61                 | 0.33           | 4.873   | <0.0001*** |

**Table S1. GLMM statistical analysis, related to Figure 2**

Results of GLMM fits to ballooning behaviour data. All models had spider identification number as a random factor with varied intercept and the same slope (1 | spider identification) to prevent pseudoreplication of repeated measurements on the same animal.
